# Supplementary material for: Genetic architecture of the structural connectome
Source: PubMed Central journal article supplement (PMC10912129; doi:10.1038/s41467-024-46023-2), 2024-03-04
Supplement: 41467_2024_46023_MOESM1_ESM.pdf [file 41467_2024_46023_MOESM1_ESM.pdf]

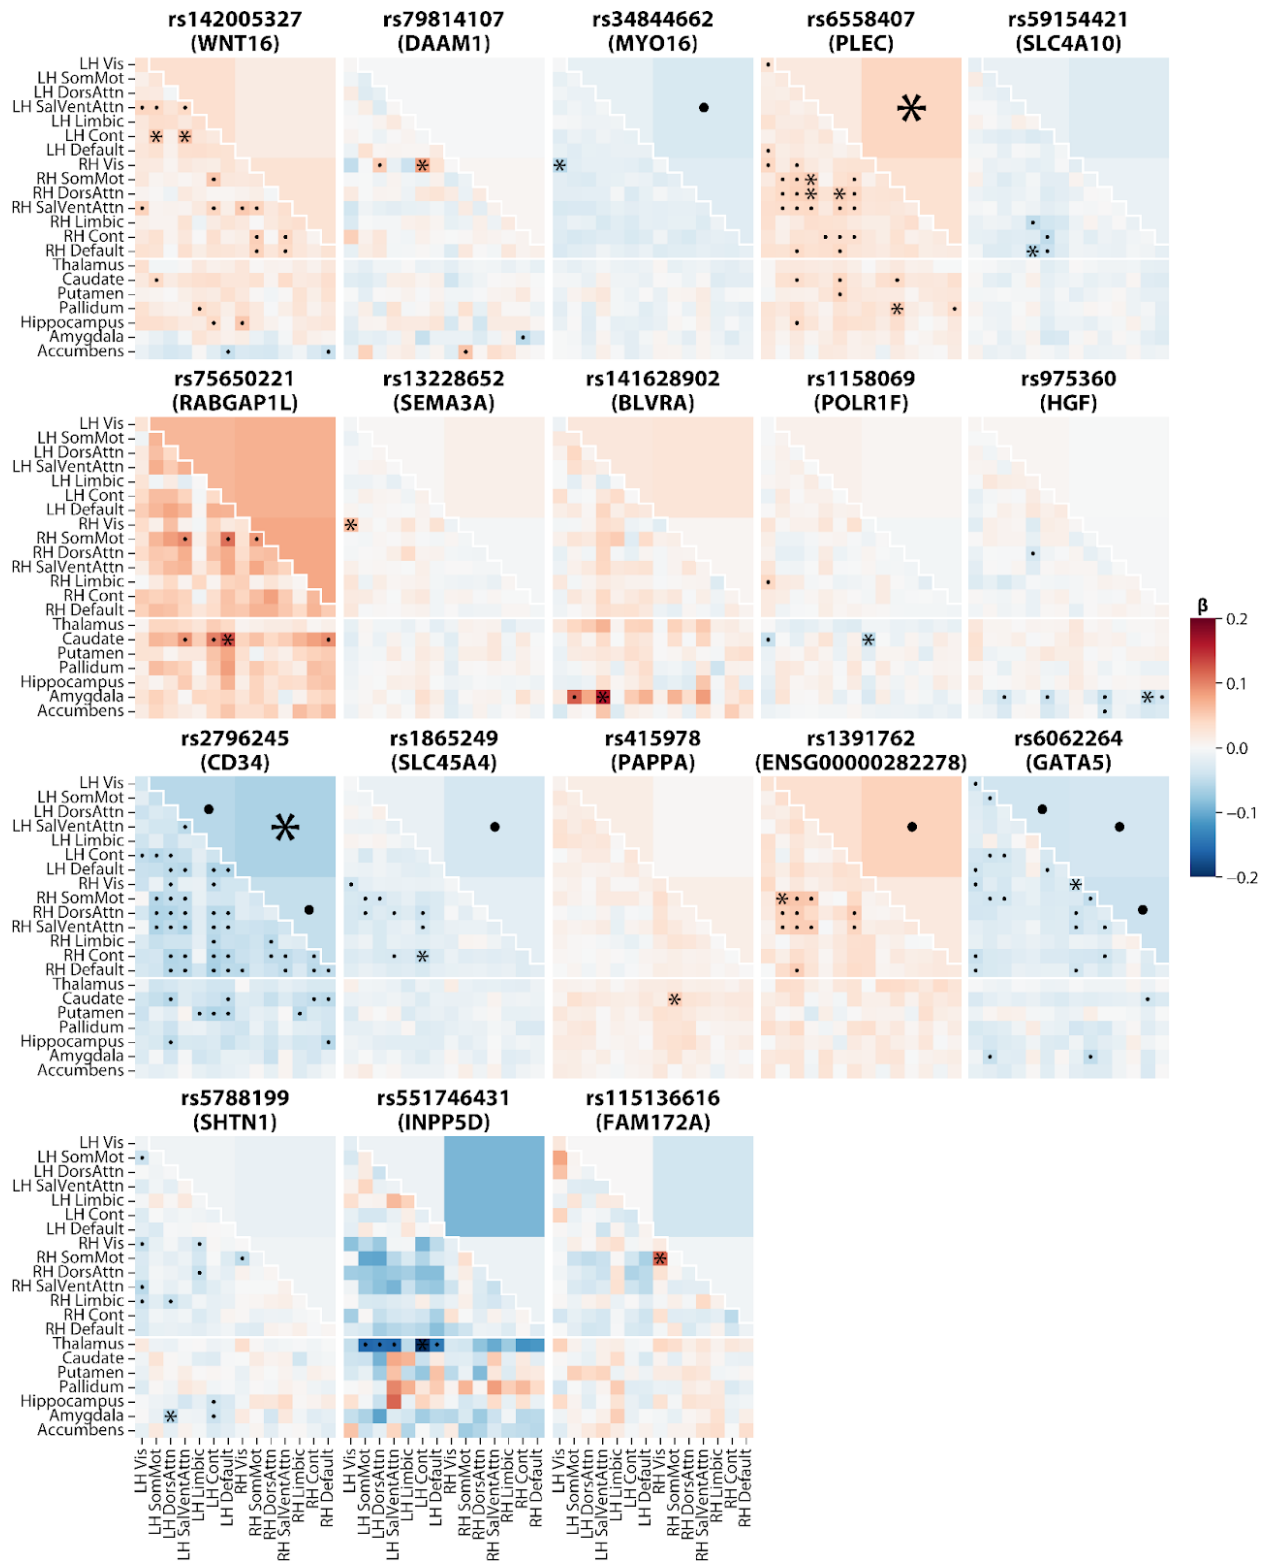

**Supplementary Figure 1: Spatial patterns of association with structural connectivity.** Continuation of Figure 4. rs59154421 (*SLC4A10*) is referred to by its UK Biobank variant identifier 2:162813034\_CTG\_C in the Supplementary Data and summary statistics, while rs551746431 (*INPP5D*) is referred to by its UK Biobank ID 2:234112457\_CCAGTACTCCCAAGTAGTCT\_C.

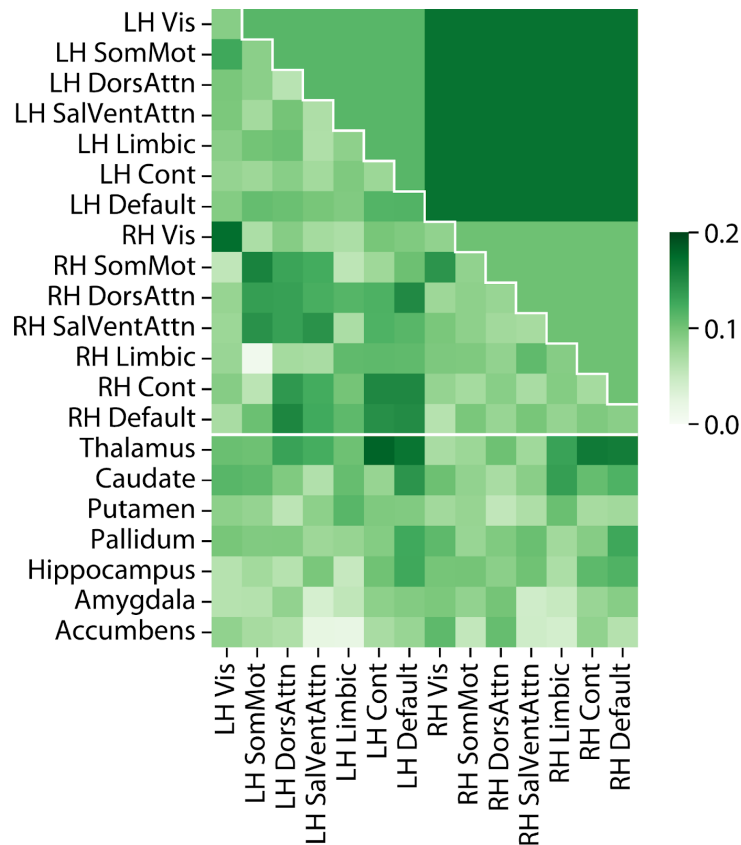

**Supplementary Figure 2: Heritability of each of the 206 measures according to LD score regression.**

**Supplementary Figure 3 (next page): Genetic correlation between structural connectivity measures and 15 brain-related traits.** Asterisks (\*) indicate significantly positive (red) or negative (blue) genetic correlations, after Bonferroni correction for the  $206 \times 15$  genetic correlations tested. ADHD = attention-deficit hyperactivity disorder, ALS = amyotrophic lateral sclerosis, LH = left-hemisphere, RH = right-hemisphere, Vis = visual, SomMot = somatomotor, DorsAttn = dorsal attention, SalVentAttn = salience/ventral attention, Limbic = limbic, Cont = control, Default = default mode.

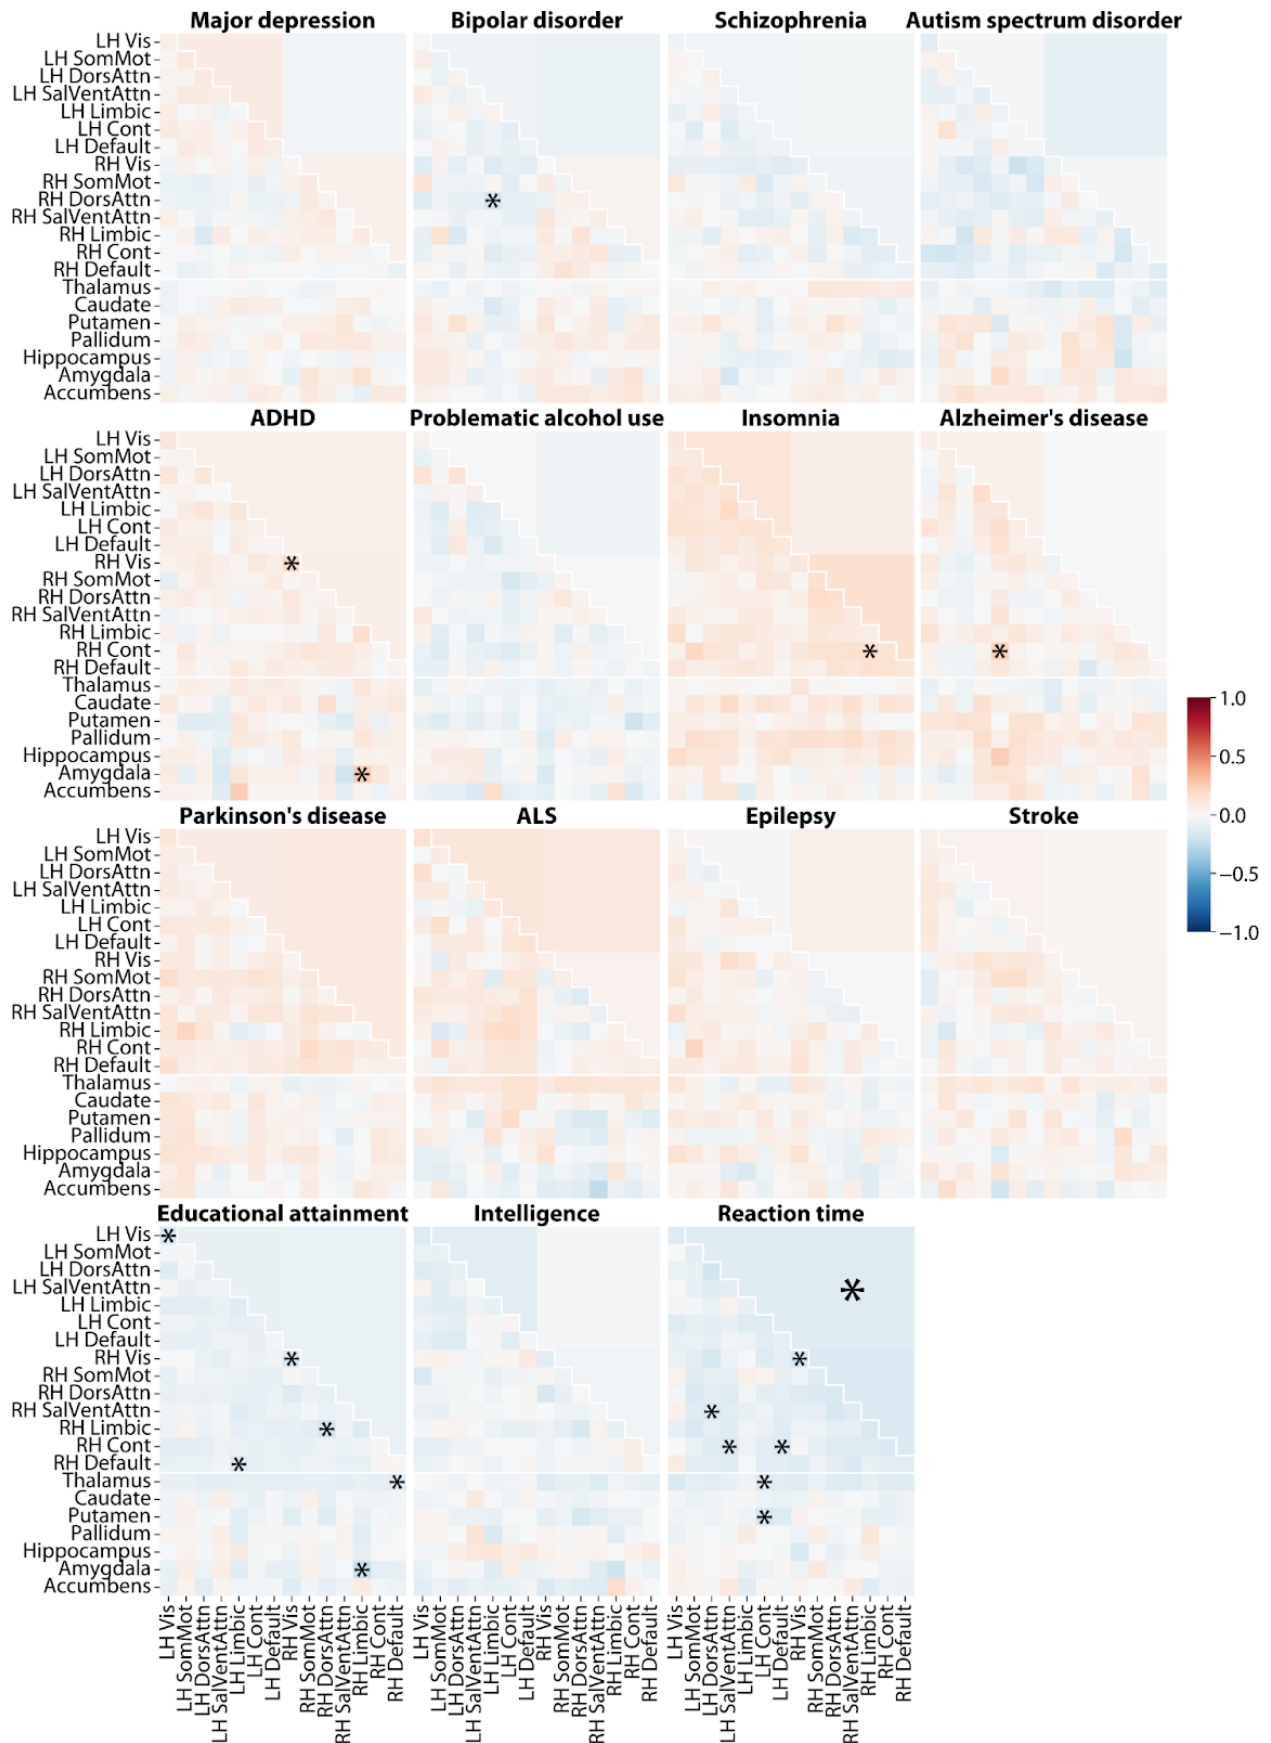

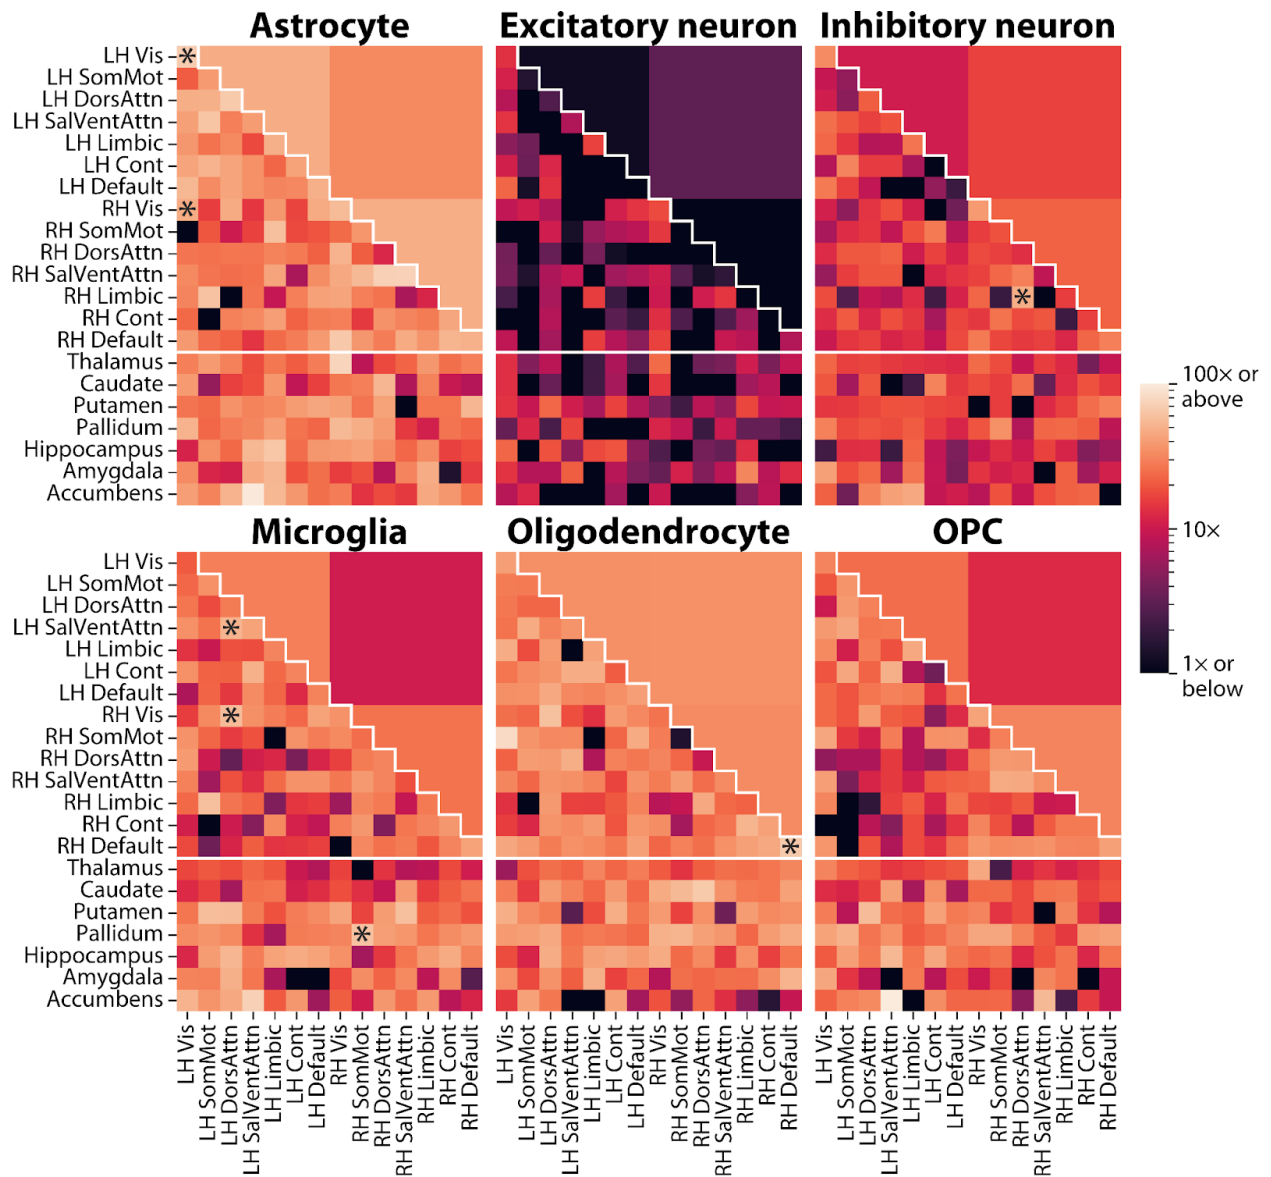

**Supplementary Figure 4: Heritability enrichment for 6 adult brain cell types.** Asterisks (\*) indicate significant heritability enrichments of structural connectivity measures for adult brain cell types after Bonferroni correction for the  $206 \times 6$  cell-type enrichments tested. OPC = oligodendrocyte precursor cell, LH = left-hemisphere, RH = right-hemisphere, Vis = visual, SomMot = somatomotor, DorsAttn = dorsal attention, SalVentAttn = salience/ventral attention, Limbic = limbic, Cont = control, Default = default mode.

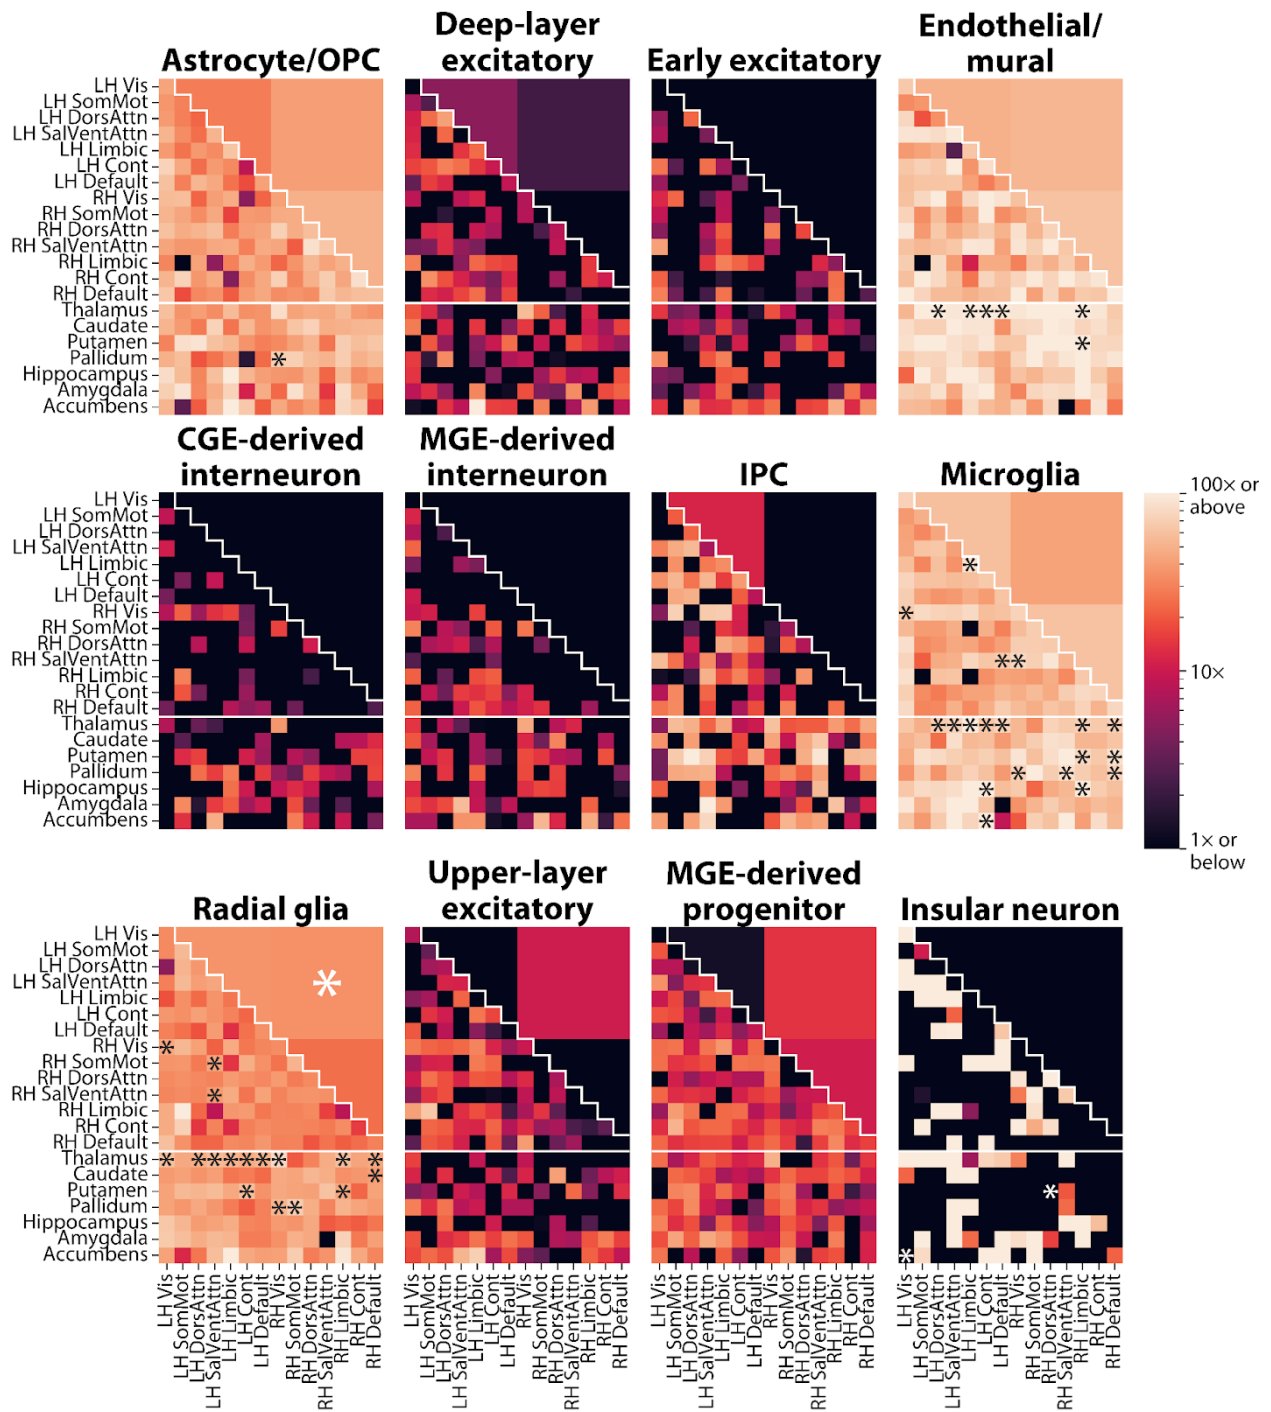

**Supplementary Figure 5: Heritability enrichment for 12 developmental brain cell types.** Asterisks (\*) indicate significant heritability enrichments of structural connectivity measures for developmental brain cell types after Bonferroni correction for the  $206 \times 12$  cell-type enrichments tested. OPC = oligodendrocyte precursor cell, excitatory = excitatory neuron, CGE = caudal ganglionic eminence, MGE = medial ganglionic eminence, IPC = intermediate progenitor cell, LH = left-hemisphere, RH = right-hemisphere, Vis = visual, SomMot = somatomotor, DorsAttn = dorsal attention, SalVentAttn = salience/ventral attention, Limbic = limbic, Cont = control, Default = default mode.

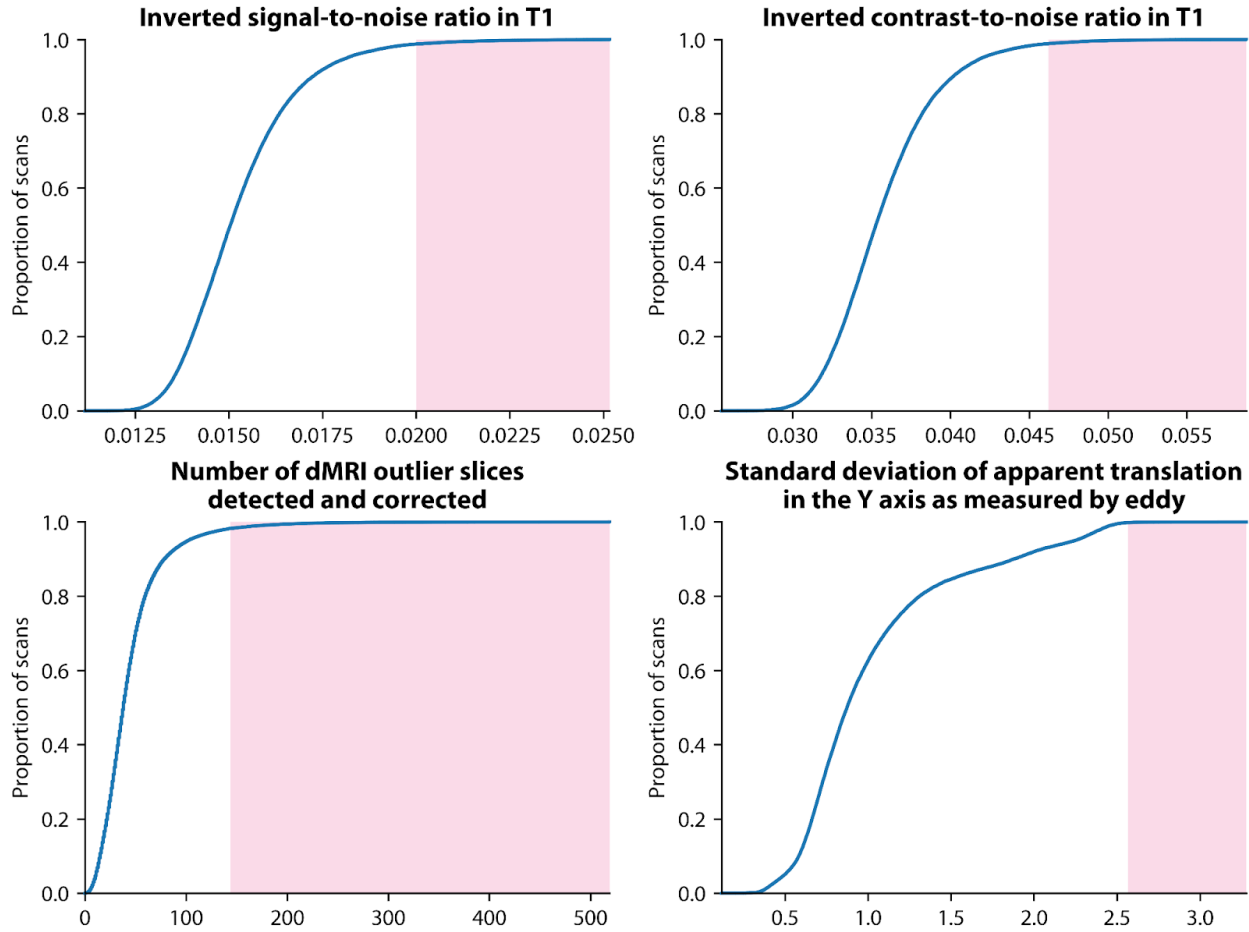

**Supplementary Figure 6: Cumulative distribution plots of the four metrics used for quality control, across all 31,309 pre-quality control baseline scans.** Scans where any of the four metrics were more than 3 standard deviations above the mean (red regions) were excluded.

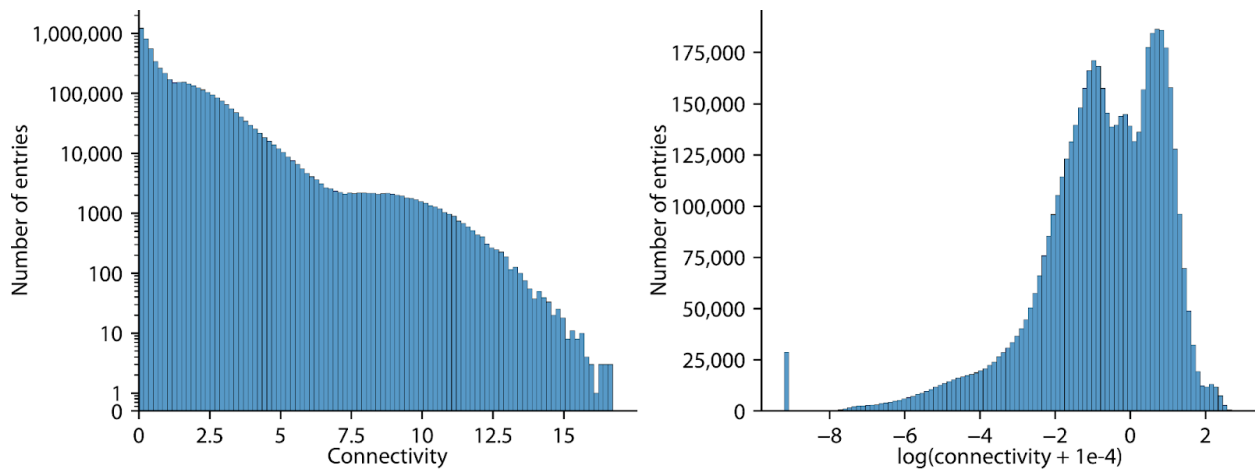

**Supplementary Figure 7: Histogram of entries in the 26,333-participant-by-206-measure structural connectivity matrix, both on the original scale (left) and log-transformed (right).** The averages of the columns of this matrix (i.e. the averages of each of the measures across participants) are shown in Figure 2B. Note the logarithmic scale of the y-axis in the left panel.
